# Supplementary material for: People Prefer Greener Corridors: Evidence from Linking the Patterns of Tree and Shrub Diversity and Users’ Preferences in Lisbon’s Green Corridors
Source: MDPI journal article supplement (doi:10.3390/su132313228), 2021-11-29
Supplement: s1 [file s1]

Table S1 – PCA component matrix for the first 2 components.

| Variable                       | PC1  | PC2   |
|--------------------------------|------|-------|
| Plant variables                |      |       |
| Richness                       | .485 | .870  |
| Relative abundance             | .456 | .093  |
| Trees                          | .372 | .734  |
| Shrubs                         | .360 | .550  |
| Native                         | .215 | .552  |
| Exotic                         | .456 | .699  |
| Anemophilous pollination       | .296 | .579  |
| Entomophilous pollination      | .390 | .636  |
| Anemochory                     | .342 | .484  |
| Zoochory                       | .377 | .763  |
| Deciduous leaves               | .271 | .431  |
| Evergreen leaves               | .370 | .744  |
| Fleshy fruits                  | .229 | .647  |
| Dry fruits                     | .464 | .653  |
| Users variables                |      |       |
| Number of users                | .957 | -.263 |
| Female                         | .938 | -.283 |
| Male                           | .954 | -.229 |
| Children                       | .739 | -.230 |
| Young                          | .912 | -.235 |
| Adults                         | .938 | -.233 |
| Elderly                        | .760 | -.267 |
| Alone                          | .798 | -.202 |
| Accompanied                    | .918 | -.255 |
| Walking                        | .952 | -.226 |
| Running                        | .658 | -.279 |
| Bike                           | .831 | -.276 |
| Others (rollerblades, scooter) | .137 | -.241 |
| Work/school                    | .526 | -.142 |
| Leisure                        | .915 | -.230 |
| Doing sport                    | .680 | -.304 |
